# Supplementary material
Source: PubMed Central journal article supplement (PMC8628578)
Supplement: NIHMS1753577-supplement-Supplementary_Figure_2.pdf [file NIHMS1753577-supplement-Supplementary_Figure_2.pdf]

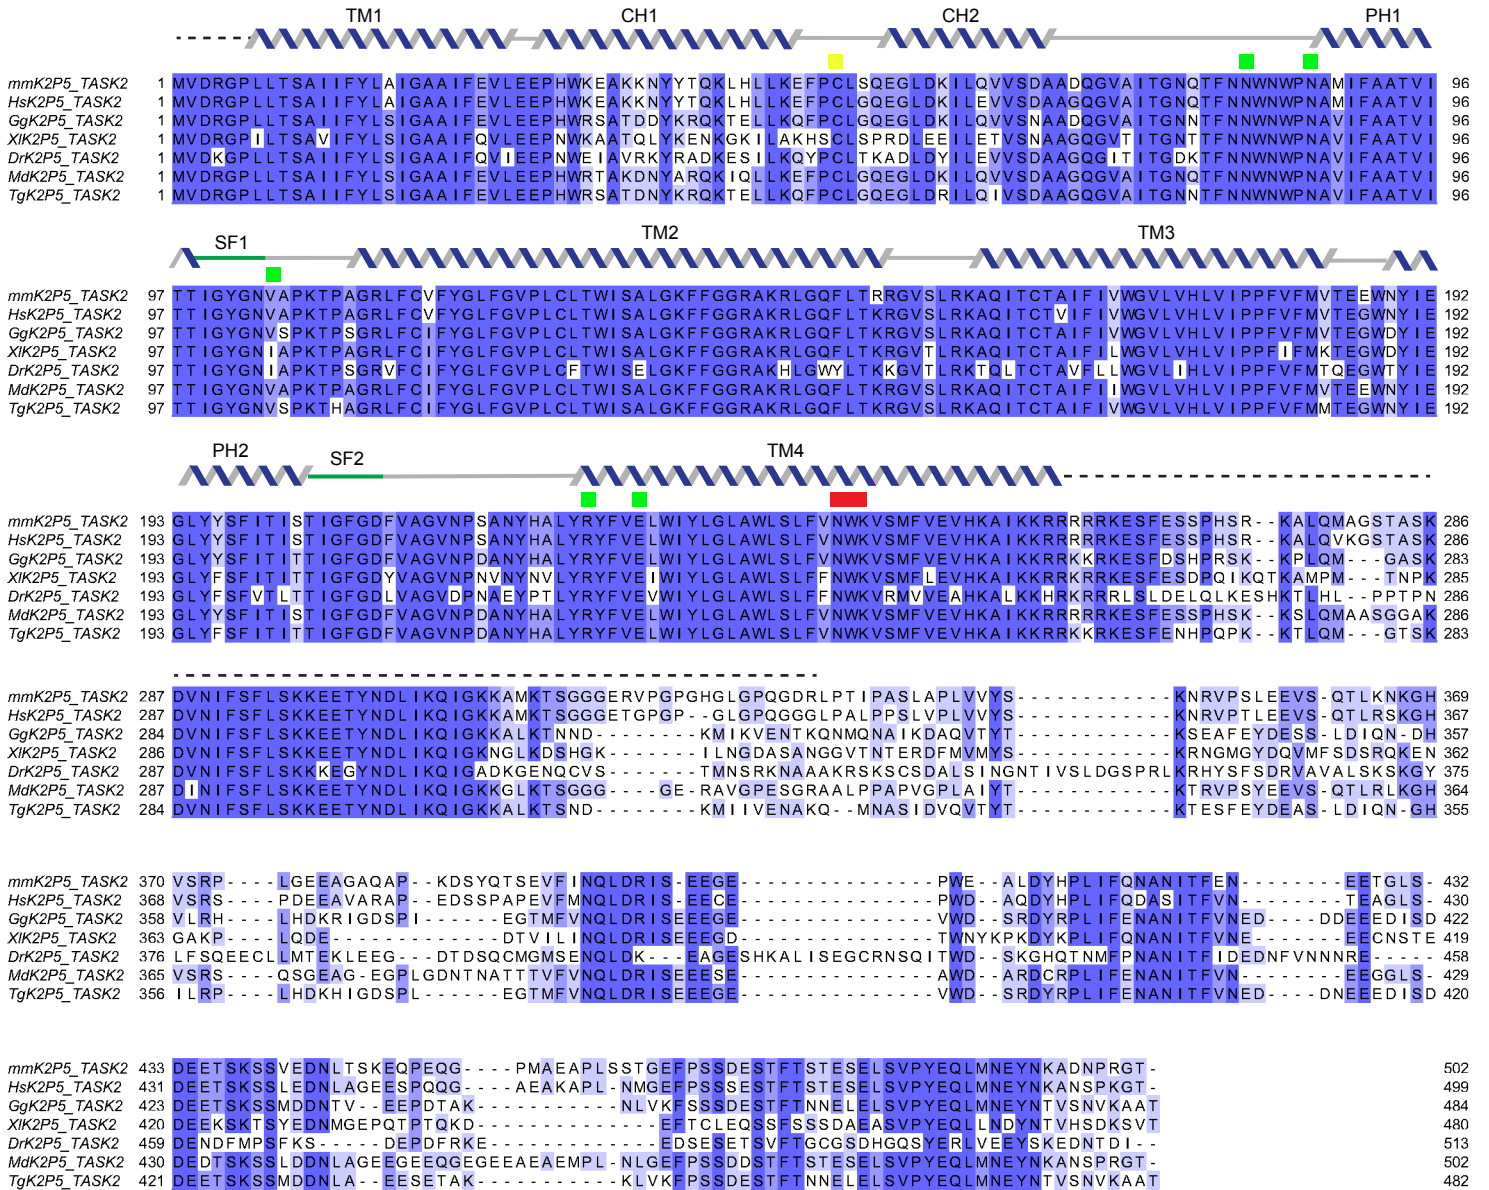

**Supplementary Figure 2 | Sequence alignment of TASK2 channels.** Alignment of *M. musculus*, *H. sapiens*, *G. gallus*, *X. laevis*, *D. rerio*, *M. domestica*, and *T. guttata* TASK2 colored by conservation. TASK2 secondary structure is drawn above the sequences with gaps and unmodeled residues shown as dashed lines, loops and non-helical secondary structure as gray lines, and selectivity filters as green lines. Residues implicated in the extracellular gate are indicated with green boxes, residues implicated in the intracellular gate with red boxes, and disulfide bond forming C51 with a yellow box.
