# Supplementary material
Source: PubMed Central journal article supplement (PMC8628578)
Supplement: NIHMS1753577-supplement-Supplementary_Figure_3.pdf [file NIHMS1753577-supplement-Supplementary_Figure_3.pdf]

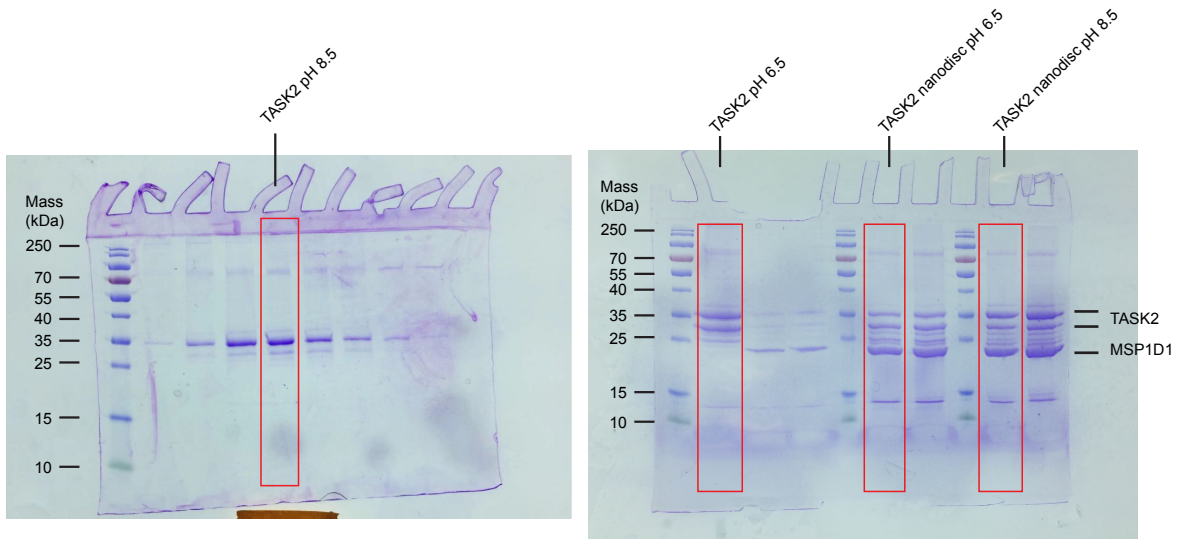

**Supplementary Figure 3 | SDS-PAGE gels of purified and reconstituted TASK2.** Uncropped original gel images with regions shown in Extended Data Fig. 1 outlined in red. Molecular weight of bands in marker lane is indicated.
